# Supplementary material
Source: PubMed Central journal article supplement (PMC56938)

|            |                |              |                                                                                                             |
|------------|----------------|--------------|-------------------------------------------------------------------------------------------------------------|
| <i>Dre</i> | <i>Cldna</i>   | (AF359423)   | 1---MVSAGLQMGVIALAVIGWIGVIVVCLPMPWQVTAFIGQN--IVTAQVTWEGIWMSCVVQST-GQMCKVYDS-MLALS--SDLQAARALCIISILV91       |
| <i>Dre</i> | <i>Cldnb</i>   | (AF359426)   | 1---MASTGLQMLGIALAIFGWIIVVLCALPMWKVTAFIGAN--IVTSQTSWEGIWMSCVVQST-GQMCKVYDS-MLALS--SDIQAARALTVISIVIG91       |
| <i>Dre</i> | <i>Cldnc</i>   | (AF359432)   | 1---MASFGLLELVGVTLSVLGWILNIVCCALPMWRVTAFIGTN--IVTAQVYWEGIWMSCVVQST-GQMCKVYDS-MLALP--ADLQAARALVVVAIVIG91     |
| <i>Dre</i> | <i>Cldnd</i>   | (CAA09777)   | 1---MASVGLQLLATVLAIIIGWLGEIVICALPMWKVTAFIGNN--IVTAQIFWEGIWMNCVQST-GQMCKVYDS-MLALP--QDLQAARALVVISIVIT91      |
| <i>Dre</i> | <i>Cldne</i>   | (AF359425)   | 1---MVSMCREILGMCLAIIGFLGAIICALPMWKVTAFIGAN--IVTAQTIWEGIWMNCVMQST-GQMCKIYDS-LLALP--QDLQAARALVVIAIVIS91       |
| <i>Dre</i> | <i>Cldnf</i>   | (AF359424)   | 1---MGRIAKEVAGQTLCFIGFVGICCCGIPMWRVTTYIGAN--IVTQIVVDGLWMNCVMQST-GQMCKIQDS-IMNLT--QDLQVARALVIISILIG91        |
| <i>Dre</i> | <i>Cldng</i>   | (CAA09778)   | 1---MSTGLQLLGTTLGTLGWLGIIISCAIPLWRVTAFIGNN--IVTAQTMWEGIWMSCVVQST-GQMCKVYDS-MLALA--QDLQASRAILVISIVIG90       |
| <i>Hsa</i> | <i>CLDN6</i>   | (CAB56533)   | 1---MASAGMQLIGVVLTLGLGWVNLVSCALPMWKVTAFIGNS--IVVAQVVWEGIWMSCVVQST-GQMCKVYDS-LLALP--QDLQAARALCVIALLLVA91     |
| <i>Hsa</i> | <i>CLDN9</i>   | (CAA10254)   | 1---MASTGLLELLGMLTAVLGLWGLTIVSCALPLWKVTAFIGNS--IVVAQVVWEGIWMSCVVQST-GQMCKVYDS-LLALP--QDLQAARALCVIALLLA91    |
| <i>Dre</i> | <i>Cldnh</i>   | (AF359434)   | 1---MSMGLEIGGIALGIIGWIIISIVACALPMWRVSAFVGAN--IVTAQVIWEGIWMNCVQST-GQMCKVYDS-MLALG--QDLQASRAMTVIAIILA90       |
| <i>Dre</i> | <i>Cldni</i>   | (AF359428)   | 1---MGSAGVQIVCVALGILGLIATVVTIAIPQWKTSAFIQGN--IITAQVSEEGIWMQCVVQST-GQQCKSYDS-LLILS--SDLQAARAMTIIISCMLS91     |
| <i>Hsa</i> | <i>CLDN3</i>   | (NP_001297)  | 1---MSMGLEITGTALAVLGLWGLTIVCCALPMWRVTAFIGSN--IITSQNIWEGIWMNCVQST-GQMCKVYDS-LLALP--QDLQAARALVVAILLA90        |
| <i>Hsa</i> | <i>CLDN4</i>   | (NP_001296)  | 1---MASMGLQVMGIALAVLGLAVMLCCALPMWRVTAFIGSN--IVTSQTIWEGIWMNCVQST-GQMCKVYDS-LLALP--QDLQAARALVIISIVIA91        |
| <i>Dre</i> | <i>Cldnj</i>   | (AF359430)   | 1-----MALQVLGITLSMIGFAGTIIICALPMWKVTAFIGTN--IVVAQVFWEGIWMTCVYERI-GQMCKLYDA-LLDLD--PFLQASRLIVTTMALA88        |
| <i>Hsa</i> | <i>CLDN5</i>   | (NP_003268)  | 1---MGSAALEILGLVLCVWGGGLILACGLPMLPQVTAFLDHN--IVTAQTTWKLGLWMSCVVQST-GHMCKVYDS-VLALS--TEVQAARALTVSAILLA91     |
| <i>Hsa</i> | <i>CLDN17</i>  | (NP_036263)  | 1---MAFYPLQIAGLVLGFLGMVGTLLATLLPQWRVSAFVGSN--IIVFERLWEGIWMNCIRQAR-VRLQCKFYSS-LLALP--PALETARALMCAVALS91      |
| <i>Hsa</i> | <i>CLDN8</i>   | (NP_036264)  | 1---MATHALEIAGLFLGGVGMVGTAVTVMPQWRVSAFIENN--IVVFNFWEGIWMNCVRQAN-IRMCKIYDS-LLALS--PDLQAARGLMCAASVMS91        |
| <i>Hsa</i> | <i>CLDN12</i>  | (NP_036261)  | 1MGC RDVHAATVLSFLCGIASVAGLFAGTLLPNWRKRLRLITFNR-NEKNLTVYTG LWVKCARYD--GSSDCLMYDTTWYSSVDQLDLRVLQFALPLSMLIA97  |
| <i>Dre</i> | <i>Cldn12</i>  | (AF359433)   | 1MSCRDIHATNAFAFVIAMLSVGGTLVATLIPQWRMRLLTFRN-NAKNVTVYDGLWTKVRRD--GSSGCYYFSDWYAKVDQLDLRLQFCLPTGLLFS97         |
| <i>Hsa</i> | <i>CLDN20</i>  | (P56880)     | 1---MASAGLQLLAFILALS GVSGLTATLLPNWKVNVVDVDSN--IITAIVQLHGLWMDCTWYST-GMFSCALKHS-ILSLP--THVQAARATMVLACVLS91    |
| <i>Hsa</i> | <i>CLDN2</i>   | (NP_065117)  | 1---MASLGLQLVGYILGLLGLLGLTAVMLLPSSWKTSYV GAS--IVTAVGFSKGLWMECATHST-GITQCDIYST-LLGLP--ADIQAAQAMMVTSAIS91     |
| <i>Hsa</i> | <i>CLDN14</i>  | (NP_036262)  | 1---MASTAVQLLGFLLSFLGMVGTLLITLILHWRRTAHVGTN--ILLTAVSYLKLGLWMECVWHST-GIYQCQIYRS-LLALP--QDLQAARALMVISCLLS91   |
| <i>Dre</i> | <i>Cldn19</i>  | (AF359436)   | 1---MAHAGLQMLGYCLGFLGLLGLIASTAMA EWKMSYAGDN--IITAQAQYEGIWLQSCVQSST-GQLQCKKYDS-LLKLP--GEIQARGLMLTGIFLC91     |
| <i>Hsa</i> | <i>CLDN19</i>  | (AL136383.3) | 1---MANSGLQLLGFLLALGGWVGI IASTALPQWKQSSYAGDA--IITAVGLYEGIWMSCVQSST-GQVQCKLYDS-LLALD--GHIQSARALMVAVLLG91     |
| <i>Hsa</i> | <i>CLDN7</i>   | (CAA09626)   | 1---MANSGLQLLGFSMALLGWVGLVACTAIPQWQMSYAGDN--IITAQAMYKGLWMDCVTQST-GMMSCKMYDS-VLALS--AALQATRALMVVSLVIG91      |
| <i>Dre</i> | <i>Cldn7</i>   | (CAA09776)   | 1---MAHKGLQLLGFLLSLLGLIIGLIIGTIMPQWKMSAYVGDN--IITAIAMYQGLWMSCAVQST-GQQCKVYDS-VLQLD--SALQATRALMVVAILLT91     |
| <i>Hsa</i> | <i>CLDN1</i>   | (AAD16433)   | 1---MANAGLQLLGFILAFGLWIGAVVSTALPQWRRIYSYAGDN--IVTAQAMYEGIWMSCVQSST-GQIQCKVYDS-LLNLS--STLQATRALMVVIGILG91    |
| <i>Hsa</i> | <i>CLDN10</i>  | (NP_008915)  | 1---MASTASEIIAFMVSISGWVLSSTLPTDYKVVSTIDGT--VITTATYWANLWKACVTDST-GVSNCKDFPS-MLALD--GYIQACRGLMIAAVSILG90      |
| <i>Hsa</i> | <i>CLDN15</i>  | (NP_055158)  | 1---MSMAVETFGFFMATVGLLMLGVTLPNSYWRVSTVHGN--VITNTNIFENLWFS CATDSL-GVYNCWEFPS-MLALS--GYIQACRALMITAILLG89      |
| <i>Dre</i> | <i>Cldn10</i>  | (AF359427)   | 1---MSTALEVTGYFMCLIGWVLTGLAVANDYWKISSIQGN--IVIVSNRLYENLWHACGEDST-GKANCFDQFS-MLALP--VHIQACRALVIAIALLG89      |
| <i>Hsa</i> | <i>CLDN16</i>  | (NP_006571)  | 71----MRDLLQYIACFFAFFSAGFLIVATWTD CWMVNADD--SLEVSTKCRGLWWE CVTNAFDGI RCTDEYDSILA EHP--LKL VVTRALMITADILA159 |
| <i>Hsa</i> | <i>CLDN11</i>  | (CAB55487)   | 1---MVATCLQVVG FVTSFVGIIVVTTSTNDWVVTGTYTPTCRKLDDELGSKGLWADCVMAT--GLYHCKPLVD-ILILP--GYVQACRALMIAASVIG92      |
| <i>Dre</i> | <i>Cldn11</i>  | (AF359429)   | 1---MSNSCRLLCGFLMSFVGI I IATSTNDWVLSCTYGS HSCRNMDDELTKGLWTECVIST--ALYHCIPLNQ-VRRIP--AYIQACRVLMSASLLG91      |
| <i>Hsa</i> | <i>CLDN18</i>  | (NP_057453)  | 1---MSTTTCQVVAFLLSILGLAGCIAATGMDMWSTQDLYDN--PVTSVFQYEGIWRSCVRRQSS-GFTECRPYFT-ILGLP--AMLQAVRALMIVGIVIG90     |
| <i>Hro</i> | <i>HrCldna</i> | (CAB96130)   | 1---MVNEVLQVFGFLLTVLGWLLSVTCSISSWKRS DVKGE--VIESITRTTGLWIRCTQQAT-GHWTCNDYDSYFLGLP--VPLQGARATLLSLLIG91       |
| <i>Mmu</i> | <i>Cldn13</i>  | (NP_065250)  | 1---MVSQKEAISFSVTSLSGWVGAIVSCVLPVWRVTFP DDE--TDPDATIWEGLWHICQVREN-RWIQCTLYDT-RILVA--QDIKVS RVMVICTIGT90     |
| <i>Cel</i> | <i>F53B3.5</i> | (AAA81409)   | 1-----MGSPCIWSNEFMVPE--SKKEHFSNNELYRHYAAK-----ATTIAYVVGIVFV46                                               |

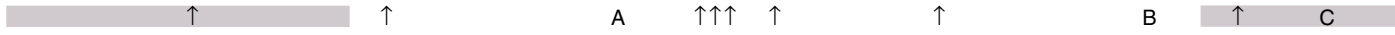

|            |         |     |                          |               |               |                          |                |                              |           |
|------------|---------|-----|--------------------------|---------------|---------------|--------------------------|----------------|------------------------------|-----------|
| <i>Dre</i> | Cldna   | 92  | VVGILLAAAGGKCTTCIEEBER   | --AKAKVCVIS   | --GAIFIVAGVLC | LPVCWTANNIIRDFYNPMTNSAQK | -----RELGASLFI | GWGASALLIIGGSLLC             | 182...206 |
| <i>Dre</i> | Cldnb   | 92  | VMGIMLSMAGGKCTNCIEEES    | --SKAKVGITA   | --GVIFIISGVLC | LPVCWTANAIIQDFYNPLVVOAQK | -----REIGASLYI | GWGASALLIIGGSLLC             | 182...215 |
| <i>Dre</i> | Cldnc   | 92  | VLALFVAIVGAKCTNCIEEEA    | --AKARVMISS   | --GAAFITASV   | LQLIPVCWSAHTVILEFYSP     | -----MEIGASLYL | GWAAASMLLVGGSILC             | 182...218 |
| <i>Dre</i> | Cldnd   | 92  | FMGVFLTIAAGKCTNCIEDQD    | --AKAKVVVAA   | --GVFFLVGGI   | LCLIPVCWSANSVIKDFYNP     | -----RELGASLFI | GWGASGLLLLGGALLC             | 182...208 |
| <i>Dre</i> | Cldne   | 92  | FFALILGIAGGKCTNFVERED    | --AKAKVSIAS   | --GVIFIAGV    | LVLPVCWSANTIIRDFYNPL     | -----REMGASLYI | GWVAALLIIGGGILC              | 182...209 |
| <i>Dre</i> | Cldnf   | 92  | FMGMLLTFIQQSSCLKNES      | --SMAKVLILG   | --GILCTIVAG   | VLLLPVCWSAAYTISDYVS      | -----RELGASIYV | GWGASAPLLFFGGIILC            | 182...237 |
| <i>Dre</i> | Cldng   | 91  | LIAMFASFAGGKCTNCLADNS    | --AKALVATTG   | --GVAFIIAGI   | LGLVPPSWTANTIIIRDFYN     | -----REFGAALFI | CWGAALLVIGGGLLC              | 181...209 |
| <i>Hsa</i> | CLDN6   | 92  | LFGLLVYLAGAKCTTCVVEEKD   | --SKARLVLTS   | --GIVFVISG    | VLTLPVCWTAHAVIRDFYN      | -----RELGASLYL | GWAAASGLLLLGGGLLC            | 182...220 |
| <i>Hsa</i> | CLDN9   | 92  | LLGLLVAITGAQCTTCVEDEG    | --AKARIVLTA   | --GVILLLAGI   | LVLPVCWTAHAIIQDFYN       | -----RELGASLYL | GWAAAAALLMLGGGLLC            | 182...217 |
| <i>Dre</i> | Cldnh   | 91  | VLGVMI SVMGAKCTNCIEDEG   | --AKAKVMIVS   | --GIMFIIAGI   | LDLIPSAWANQIIIRDFYN      | -----REFGASIIY | IGFAAALLIIGGAMLC             | 181...214 |
| <i>Dre</i> | Cldni   | 92  | VLSLLILCGADFTTCIENED     | --VKPKVTLVS   | --AIGLILAG    | LGLVLPVSWAANNVVRDFNN     | -----RELGPCIIY | IGWASGVLLILAGGLC             | 182...211 |
| <i>Hsa</i> | CLDN3   | 91  | AFGLLVALVGAQCTNCVQDDT    | --AKAKITIVA   | --GVLFLLA     | AALLTLVPVWSANTIIRDFYN    | -----REMGAGLYV | GWAAAAQLLGGALLC              | 181...220 |
| <i>Hsa</i> | CLDN4   | 92  | ALGVLLSVVGGKCTNCLADES    | --AKAKTMIVA   | --GVVFLLAG    | LVMIVPWSATHNIIRDFYN      | -----REMGASLYV | GWAAASGLLLLGGGLLC            | 182...209 |
| <i>Dre</i> | Cldnj   | 89  | SLAFLIFLIGADCTNCLSNPR    | --AKGRIVVVS   | --GITFMLS     | GTLTVVPSWTADSIIRDFHN     | -----REMGAAALY | VGWLTAGFLFVGGAILC            | 179...210 |
| <i>Hsa</i> | CLDN5   | 92  | FVALFVTLAGAQCTTCVAPGP    | --AKARVALTG   | --GVLFLFC     | GLLALVPCWFANIVVREFYD     | -----YELGAALY  | IGWAAATALLMVGGCLLC           | 182...218 |
| <i>Hsa</i> | CLDN17  | 92  | LIALLIGICGMKQVQCTGSNER   | --AKAYLLGTS   | --GVLFIILT    | GIFVLPVSWTANIIIRDFYN     | -----RELGAALFL | GWASAAVLFVGGGLC              | 183...224 |
| <i>Hsa</i> | CLDN8   | 92  | FLAFMMAILGMKCTRCTGDNEK   | --VKAHILLTA   | --GIFFIIT     | GMVVLIPVSWANAIIRDFYN     | -----RELGEALYL | GWTTALVIVGGALFC              | 183...225 |
| <i>Hsa</i> | CLDN12  | 98  | MGALLLCLIGMCNTAFRSSVPI   | --IKLAKCLVN   | SAGCHLVAGL    | LFFLAGTVLSPSIWFIFYNI     | -----VFSFDYAV  | YVTIASAGGLFMTSLILF           | 193...244 |
| <i>Dre</i> | Cldn12  | 98  | SLALLLCLTGMCKTACCSKTPDDI | --KNSRCLVN    | SSGCHLVAGM    | LLFLGGAIAMPPSVWFLFH      | -----LFAVEFGV  | YVAIGSAGGLILAALLMF           | 194...341 |
| <i>Hsa</i> | CLDN20  | 92  | ALGICTSTVGMKCTRRLGGDRE   | --TKSHASFAG   | --GVCFMSA     | GISSLISTVWYTKELIANFL     | -----HEPGGAIY  | IGFISAMLLFISGMIFC            | 182...219 |
| <i>Hsa</i> | CLDN2   | 92  | SLACIISVVGMRCTVFCQESR    | --AKDRVAVAG   | --GVFFILG     | GLLGFIPVAWNHLGILRDFYS    | -----FEIGEALYL | GIISSLFSLIAGIILC             | 182...230 |
| <i>Hsa</i> | CLDN14  | 92  | GIACACAVIGMKCTRCAKGTTP   | --AKTTFAILG   | --GTLFILAG    | LLCMVAVSWTNDVVQNFYN      | -----FEIQALYL  | GFISSLSLIGGTLLC              | 182...239 |
| <i>Dre</i> | Cldn19  | 92  | GLSTLVSVFVGMKCTTCLSEAPQ  | --VKSQVALAG   | --GVLFITG     | GGLFALIATSWYGEKIRQK      | -----YEFGKALY  | VGWGSSALSIIIGGSLLC           | 183...210 |
| <i>Hsa</i> | CLDN19  | 92  | FVAMVLSVGMKCTRVGDSNPI    | --AKGRVAIAG   | --GALFILAG    | LCTLTAVSWYATLVQEFFN      | -----YFPGPALF  | VGWASAGLAVLGGSFCLC           | 183...211 |
| <i>Hsa</i> | CLDN7   | 92  | FLAMFVATMGKCTRCCGDDKV    | --KKARIAMGG   | --GIIFIVAG    | LAALVACSWYGHQIVTDFYN     | -----YFPGPAIF  | IGWAGSALVILGGALLS            | 183...211 |
| <i>Dre</i> | Cldn7   | 92  | VAGLGVASMGKCTNCGDDKV     | --KKSRIAMTG   | --GIILSVG     | ALCSIVACGWFTSQIIRDFYN    | -----YFPGAAFI  | IAWAGAFDIMGGMLA              | 183...215 |
| <i>Hsa</i> | CLDN1   | 92  | VIAIFVATVGMKCMKCLEDDDEV  | --QKMRMAVIG   | --GAIFLLA     | GLAILVATAWYGNRIQEFYD     | -----YFPGQALF  | TGWAAASLCLLGGALLC            | 183...211 |
| <i>Hsa</i> | CLDN10  | 91  | FFGSIFALFGMKCTKVGGSDK    | --AKAKIACLA   | --GIVFILS     | GGLCSMTGCSLYANKITTEFFD   | -----YELGAALF  | IGWAGASLCIIGGVIFC            | 180...228 |
| <i>Hsa</i> | CLDN15  | 90  | FLGLLLGIAGLRCTNIGGLELS   | --RKAKLAATA   | --GALHILAGI   | CGMVAISWYAFNITRDFFD      | -----YELGPALY  | LGWASLISILGGLCLC             | 180...228 |
| <i>Dre</i> | Cldn10  | 90  | LVGLVLTSTMGLNCIKIGSKTEE  | --SKGKNMFIG   | --GIYLYIG     | GGLCTMVGVSWYAAVVQEFND    | -----FELGSGLY  | IGWAGAAALCMLGGGFQC           | 180...219 |
| <i>Hsa</i> | CLDN16  | 160 | GFGFLTLGLDCKVFLPDEPY     | --IKVVICFVA   | --GATLLIAG    | TPGIIGSVWYAVDVYVERST     | -----IQYKFGW   | SCWLGMAAGSLGCFLAGAVLT        | 254...305 |
| <i>Hsa</i> | CLDN11  | 93  | LPAILLLLTVLPCIRMGQEPGV   | --AKYRRAQLA   | --GVLILLAL    | CALVATIWFVCAHRETT        | -----IVSFGYS   | SLYAGWIGAVLCLVGGCVIL         | 176...207 |
| <i>Dre</i> | Cldn11  | 93  | LPALALLLLAMPCKVKSQETEG   | --TKHRRAVQG   | --GLIILVI     | SLCGMVSTVWFPIGKLDGL      | -----MSFGFS    | LYAGWVGSALCFFAGSVMV          | 174...256 |
| <i>Hsa</i> | CLDN18  | 91  | AIGLLVSI FALKCIRIGSMEDS  | --AKANMTLTS   | --GIMFIVS     | GLCAIAGVSVFANMLVTNFW     | -----RYTFGAAL  | VGVVAGGLTLIGGVMMC            | 193...261 |
| <i>Hro</i> | HrCldna | 92  | FFGILLAI FGLSCTTIAAENAR  | --LKARMVVAS   | --GMLHVAG     | GVSLGTGVCWFAATVLQDYQ     | -----RYVYGEAL  | FVWAAAMVVGILGGIAMC           | 184...224 |
| <i>Mmu</i> | Cldn13  | 91  | WLGLLLCVLGDWRINCFMNFPI   | --EENLLKVAG   | --GMFLSV      | -GLLMLVPLSVWTHNIHGFFN    | -----VQMGSSL   | SLSLAWTSSLLLLLGGIILC         | 181...211 |
| <i>Cel</i> | F53B3.5 | 47  | VLSFIVGLIGCWNR           | -----SKKFIMST | --GILLILAG    | LSDMSVAMLLWYVYASERYT     | -----IYKSWEP   | ILKLTSRHNYGWSYIVSWIGIGFIVIGS | 140...167 |

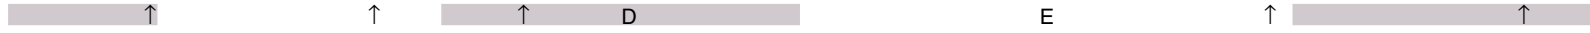

Supplement: pnas_171325898_3.pdf [file pnas_171325898_3.pdf]
