# Supplementary material
Source: PubMed Central journal article supplement (PMC56938)
Supplement: pnas_171325898_1.pdf [file pnas_171325898_1.pdf]

**Table 2. PCR primers for intron detection and radiation-hybrid mapping**

| Gene                                                                                                                      | Forward primer (5' to 3')            | Reverse primer (5' to 3')            | Result*                               |
|---------------------------------------------------------------------------------------------------------------------------|--------------------------------------|--------------------------------------|---------------------------------------|
| Detecting introns in zebrafish and mouse claudin genes                                                                    |                                      |                                      |                                       |
| <i>cldn7</i>                                                                                                              | GGCTGCTGAAAGCGAGCGATATT              | CCTTTCCAGGTCGTGAACAAATGG             | 4-5 kb instead of 753 bp              |
| <i>cldn10</i>                                                                                                             | CCCTTGAATTTTGGATTCTGAGGTTG           | CATCAACGTAACAACAGTTCAGCCTTGT         | 8 kb instead of 732 bp                |
| <i>cldn11</i>                                                                                                             | ACAAGTTTTTGGCCTTGAGGAGCA             | TTTCCAGTGAGTCTCTCACACATGTTT          | 6-7 kb instead of 835 bp              |
| <i>cldn12</i>                                                                                                             | GCTGACTTCAGCCATGTCTTGTCG             | CCTTAGACAGCCAATCTCAATCTGTGAGG        | 2.5 kb instead of 1,055 bp            |
| <i>cldn19</i>                                                                                                             | CATGGCGGAGTGAAGATGTCCT               | GCCTGCAGTCAGGTGTGTGTTCA              | 4 kb instead of 809 bp                |
| <i>cldna</i>                                                                                                              | GCTGTCTAATACACCTGCAATTGTTCCA         | CCTCCTTGAATGTAGTACTTTTGGTTCCTCA      | 679 bp                                |
| <i>cldnb</i>                                                                                                              | GAACCACCAACCAACCAACAAGGA             | CCGTAACATTGTAGAGTCCATTTTCCTGA        | 723 bp                                |
| <i>cldnc</i>                                                                                                              | TGAACATTC AACAGGAGAAAGAGACTGGA       | CAGCTACAAAACAAATGTCCTCTGAGCTTC       | 719 bp                                |
| <i>cldnd</i>                                                                                                              | GTGGAAGGTGACGGCTTTTCATTG             | ACTAGTCCAGAAAGTCGGTGCCTCA            | 563 bp                                |
| <i>cldne</i>                                                                                                              | CACAAGCCCACAAACAAACAAGCA             | CTTTGCGATCTCGGCGTAGCTCT              | 679 bp                                |
| <i>cldnf</i>                                                                                                              | GTGGCGGGTCAACCACCTACATC              | CTTTAGACGACGTCCGCTCTTTGTG            | 653 bp                                |
| <i>cldng</i>                                                                                                              | AGTTGCAAGCTCATCTGTAGGTC <sup>†</sup> | TTCAAACAGACATCCTTCAGTCA <sup>†</sup> | 1.7 kb instead of 679 bp <sup>‡</sup> |
| <i>cldnh</i>                                                                                                              | CGGCTTCAACAAAGACATCTCAACACTT         | TGTTACCCCTTTTCATCCGCTTTTG            | 742 bp                                |
| <i>cldni</i>                                                                                                              | AATAAAGGATGGGCTCCGCTGGT              | GTAATTTTGTCTGGGCGCTGAGG              | 2 kb instead of 638 bp                |
| <i>cldnj</i>                                                                                                              | GTGGTCTCCAGCCCGCTCCT                 | GGAATCCAATCATTTTTGTTTCAGTCTACG       | 705 bp                                |
| <i>Cldn13</i>                                                                                                             | TCAGCAAACAAGAGCCATCAGC               | GGTATCGTTGTTGGCTCCTGAAGGT            | 617 bp                                |
| Radiation-hybrid mapping of zebrafish claudin genes                                                                       |                                      |                                      |                                       |
| <i>cldn7</i>                                                                                                              | TGGGTAGAAGTTTGGCCCTGT                | CCCCTTTGCAAACCTCACATT                | LG10                                  |
| <i>cldn10</i>                                                                                                             | TTCCCATTTTAAACAGGCTGA                | CCGCATCCATGAAAATTGA                  | LG2                                   |
| <i>cldn11</i>                                                                                                             | CAGCATCCTGCACTAAACCTC                | GGATATTAGCGGAGATGTCTCAA              | LG24                                  |
| <i>cldn12</i>                                                                                                             | CTCCAAAACCCCTGACGAC                  | AACCAGACGGAGGGTGG                    | LG16                                  |
| <i>cldn19</i>                                                                                                             | ACTGACCGCGTCTGAACAC                  | TGATGAGCCGGTCATTTACA                 | LG2                                   |
| <i>cldna</i>                                                                                                              | CGGTTGTTGTTTGTTCATGC                 | GGCACCCCTGACATGTTTATT                | LG15                                  |
| <i>cldnb</i>                                                                                                              | TGCAGGACTTGAAGAGCAGA                 | TGACCACGGTACAAAAGAACA                | LG21                                  |
| <i>cldnc</i>                                                                                                              | TGGCTCCAAGTACCTATAACAAGA             | TCAACTTATATAATGGATTTTGAAACG          | LG21                                  |
| <i>cldnd</i>                                                                                                              | CTGGGAGCGTCACTCTTCAT                 | TTCTACACAAACAGGAGACGA                | LG21                                  |
| <i>cldne</i>                                                                                                              | TTGCTGGAGTTCTGGTGCT                  | ACGCCCATCCGATGTA                     | LG15                                  |
| <i>cldnf</i>                                                                                                              | AAGCTCAATCAACCTCAATTTGT              | CAGAATCTTCATTTTTGGGTGA               | LG15                                  |
| <i>cldng</i>                                                                                                              | TGCAGCTCTTACCCAAAAGG                 | TCAATTGATCACTTCATCTCTGC              | LG1                                   |
| <i>cldnh</i>                                                                                                              | GAATGGGCTATTCTGCTCCA                 | CACAAACAAAGCAAACAGCTAAA              | LG21                                  |
| <i>cldni</i>                                                                                                              | TTGGTGAGAGTGAAGCTGGA                 | ACACAAGCTCTGTCCCATCC                 | LG3                                   |
| <i>cldnj</i>                                                                                                              | TCTGGCACTCACAGTGCTA                  | GTAACACACACAAATTAAGTTGAACA           | LG15                                  |
| Radiation-hybrid mapping of zebrafish orthologs of human genes at 7q11.23 near <i>CLDN3</i> and <i>CLDN4</i> <sup>§</sup> |                                      |                                      |                                       |
| <i>baz1b</i>                                                                                                              | GGAAAAGGAAGCAGAAGAGGA                | GCGTTCTCCTCAACACCAG                  | LG18                                  |
| <i>bcl7b</i>                                                                                                              | CAGCAACCAGAGTTCTCTGTCA               | GTGGCTGTGGGTCATCAGT                  | LG10                                  |
| <i>cyln2</i>                                                                                                              | GTCTCCGCGTCACTCTGC                   | GCAGCAAAGTTTCTCTCTCAGG               | LG5                                   |
| <i>gtf2ird1</i>                                                                                                           | GCATTAGGCCTGGATCACAT                 | AGGATGCGCTTGAGTTTAGG                 | LG5                                   |
| <i>hip1</i>                                                                                                               | GGCAGTTCAAACCTTTCTCG                 | TATCCTCGATCTGAGACTTGC                | LG15                                  |
| <i>wbscr1</i>                                                                                                             | TTTATGTTCACTGGATGTTGTATGC            | TTGAAATGATTTATTTGGTGTTC              | LG15                                  |

\* Length of PCR product (top) or linkage group (middle and bottom). A PCR product longer than predicted from the cDNA sequence revealed the presence of at least one intron.

<sup>†</sup> Annealing temperature of 60°C.

<sup>‡</sup> Intron in 5' untranslated region between nucleotides 91 and 92.

<sup>§</sup> Primer sequences were based on the following expressed sequence tags from zebrafish: *baz1b*, fb34a12, fc43h10, and fi60d02 (predicted protein sequence 61% identical to human *BAZ1B*); *bcl7b*, fa96f08 (70% identical to *BCL7B*); *cyln2*, fc60a01 (62% identical to *CYLN2*); *gtf2ird1*, fk08g11 (84% identical to *GTF2IRD1*); *hip1*, fi33d04 and fj87e12 (80% identical to *HIP1*); *wbscr1*, fe24e08, fe16e08, and fe16e09 (82% identical to *WBSR1*).
